# Supplementary material for: Sex of Walker Influences Scent-marking Behavior of Shelter Dogs
Source: PubMed Central journal article supplement (PMC7222742; doi:10.3390/ani10040632), 2020-04-07
Supplement: animals-10-00632-s001.pdf [file animals-10-00632-s001.pdf]

**Table S1.** Effects of sex of dog, sex of walker, and time at shelter on rate of urination per min by dogs during a 20-min walk. Results are from the full model.

| <b>Parameter</b>               | <b>Estimate</b> | <b>SE</b> | <b>df</b> | <b>t value</b> | <b>P</b> |
|--------------------------------|-----------------|-----------|-----------|----------------|----------|
| Intercept                      | 0.210           | 0.042     | 206.536   | 4.975          | < 0.001  |
| Dog's sex                      |                 |           |           |                |          |
| Female                         | -0.074          | 0.042     | 138.301   | -1.781         | 0.08     |
| Male                           |                 |           |           |                |          |
| Walker's sex                   |                 |           |           |                |          |
| Female                         | 0.273           | 0.041     | 140.156   | 6.727          | < 0.001  |
| Male                           |                 |           |           |                |          |
| Time at shelter                | -0.002          | 0.002     | 212.926   | -0.783         | 0.44     |
| Dog's sex X Walker's sex       |                 |           |           |                |          |
| Female X Female                | -0.207          | 0.037     | 136.884   | -5.628         | < 0.001  |
| Female X Male                  |                 |           |           |                |          |
| Male X Female                  |                 |           |           |                |          |
| Male X Male                    |                 |           |           |                |          |
| Walker's sex X Time at shelter |                 |           |           |                |          |
| Female X Time at shelter       | -0.004          | 0.002     | 141.233   | -1.636         | 0.10     |
| Male X Time at shelter         |                 |           |           |                |          |

**Table S2.** Effects of sex of dog and sex of walker on likelihood of defecation by dogs during a 20-min walk. Results are from the full model.

| <b>Parameter</b>               | <b>Estimate</b> | <b>SE</b> | <b>z value</b> | <b>P</b> |
|--------------------------------|-----------------|-----------|----------------|----------|
| Intercept                      | -0.006          | 0.715     | -0.009         | 0.99     |
| Dog's sex                      |                 |           |                |          |
| Female                         | 0.313           | 0.660     | 0.474          | 0.64     |
| Male                           |                 |           |                |          |
| Walker's sex                   |                 |           |                |          |
| Female                         | 1.260           | 0.805     | 1.565          | 0.12     |
| Male                           |                 |           |                |          |
| Time at shelter                | -0.028          | 0.041     | -0.697         | 0.49     |
| Dog's sex X Walker's sex       |                 |           |                |          |
| Female X Female                | 0.731           | 0.767     | 0.953          | 0.34     |
| Female X Male                  |                 |           |                |          |
| Male X Female                  |                 |           |                |          |
| Male X Male                    |                 |           |                |          |
| Walker's sex X Time at shelter |                 |           |                |          |
| Female X Time at shelter       | -0.015          | 0.046     | -0.315         | 0.75     |
| Male X Time at shelter         |                 |           |                |          |

**Table S3.** Effects of sex of dog and sex of walker on likelihood of ground scratching by dogs during a 20-min walk. Results are from the full model.

| <b>Parameter</b>               | <b>Estimate</b> | <b>SE</b> | <b>z value</b> | <b>P</b> |
|--------------------------------|-----------------|-----------|----------------|----------|
| Intercept                      | -2.859          | 1.527     | -1.87          | 0.06     |
| Dog's sex                      |                 |           |                |          |
| Female                         | -1.567          | 1.310     | -1.96          | 0.23     |
| Male                           |                 |           |                |          |
| Walker's sex                   |                 |           |                |          |
| Female                         | 0.401           | 1.081     | 0.37           | 0.71     |
| Male                           |                 |           |                |          |
| Time at shelter                | 0.071           | 0.064     | 1.11           | 0.26     |
| Dog's sex X Walker's sex       |                 |           |                |          |
| Female X Female                | 0.637           | 1.014     | 0.63           | 0.53     |
| Female X Male                  |                 |           |                |          |
| Male X Female                  |                 |           |                |          |
| Male X Male                    |                 |           |                |          |
| Walker's sex X Time at shelter |                 |           |                |          |
| Female X Time at shelter       | -0.025          | 0.060     | -0.42          | 0.67     |
| Male X Time at shelter         |                 |           |                |          |

**Table S4.** Effects of sex of dog and sex of walker on likelihood of dogs having a predominant urinary posture in which all limbs remain on the ground (i.e., lean-forward posture in males and squat posture in females). Results are from the full model.

| <b>Parameter</b>               | <b>Estimate</b> | <b>SE</b> | <b>z value</b> | <b>P</b> |
|--------------------------------|-----------------|-----------|----------------|----------|
| Intercept                      | -1.746          | 0.517     | -3.38          | < 0.001  |
| Dog's sex                      |                 |           |                |          |
| Female                         | 4.101           | 0.692     | 5.92           | < 0.001  |
| Male                           |                 |           |                |          |
| Walker's sex                   |                 |           |                |          |
| Female                         | -0.303          | 0.572     | -0.53          | 0.60     |
| Male                           |                 |           |                |          |
| Time at shelter                | 0.034           | 0.030     | 1.16           | 0.25     |
| Dog's sex X Walker's sex       |                 |           |                |          |
| Female X Female                | 0.710           | 0.545     | 1.30           | 0.19     |
| Female X Male                  |                 |           |                |          |
| Male X Female                  |                 |           |                |          |
| Male X Male                    |                 |           |                |          |
| Walker's sex X Time at shelter |                 |           |                |          |
| Female X Time at shelter       | -0.022          | 0.030     | -0.72          | 0.47     |
| Male X Time at shelter         |                 |           |                |          |
